# Supplementary material for: Regulatory Role of Sphingosine-1-Phosphate and C16:0 Ceramide, in Immunogenic Cell Death of Colon Cancer Cells Induced by Bak/Bax-Activation
Source: MDPI journal article supplement (doi:10.3390/cancers14215182), 2022-10-22
Supplement: s1 [file s1]

peIF2a

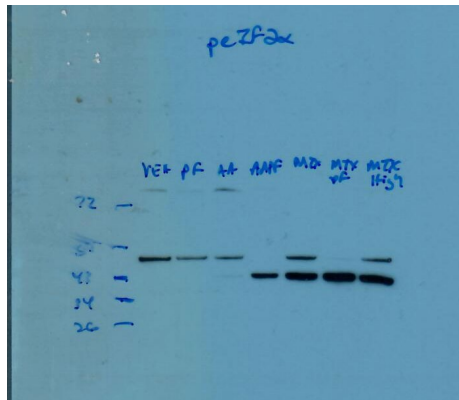

Cleaved PARP

FL Caspase 8

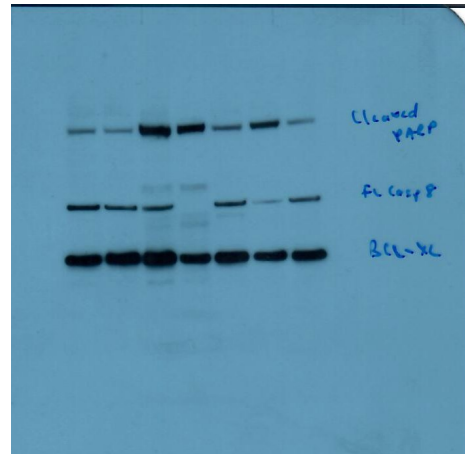

Bap31

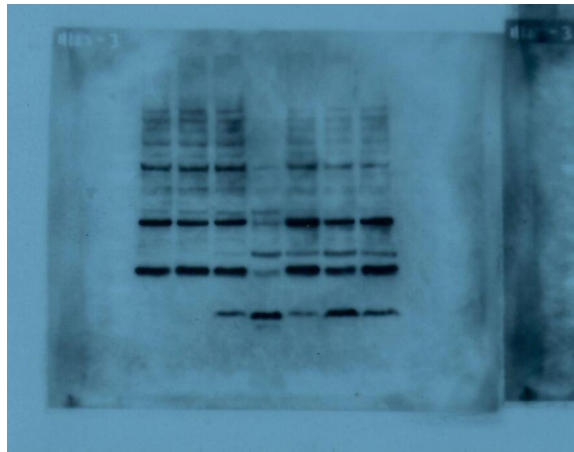

BIP 11/27/20

BIP

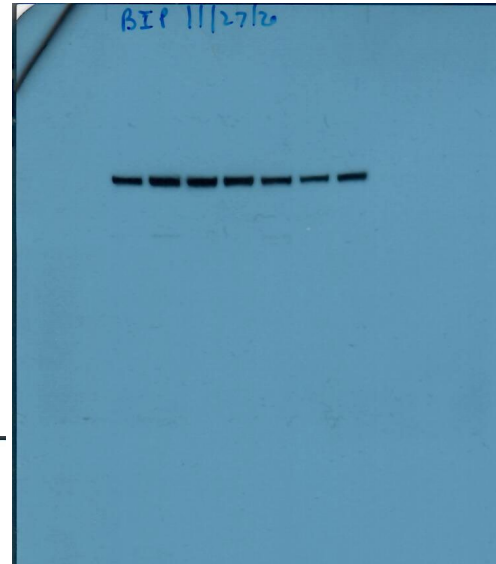

BclXL

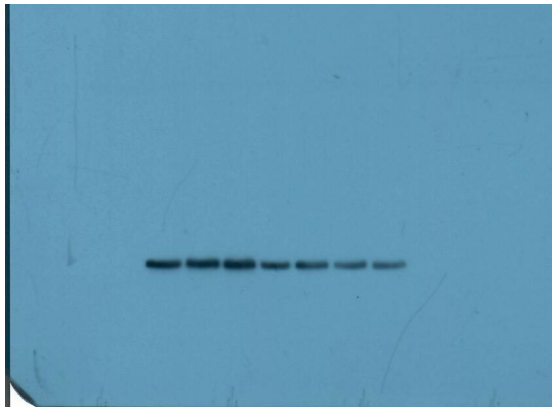

FIGURE 2B

TA-CALR

Figure 2C  
CALR

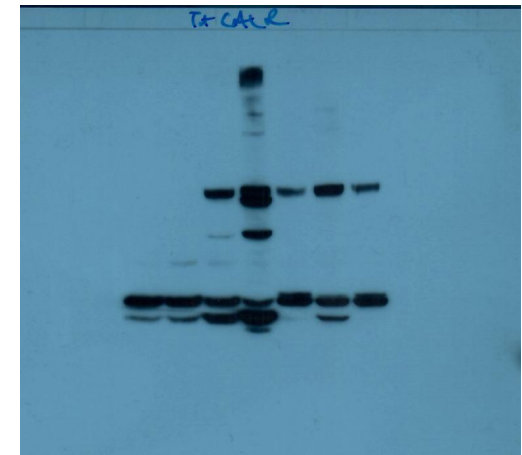

Figure 2E  
CALR

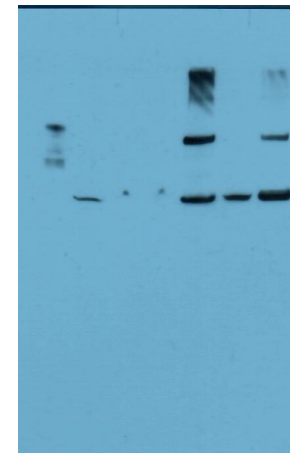

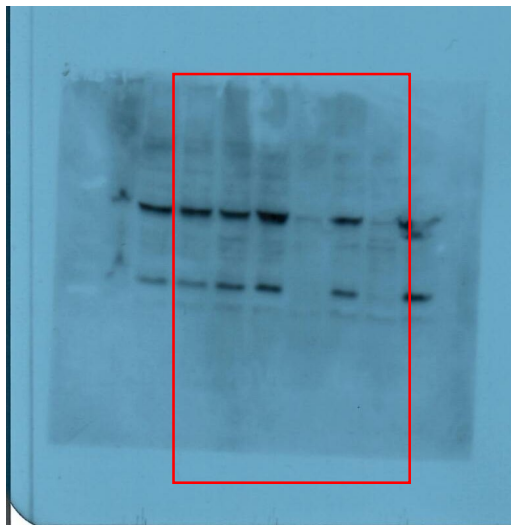

C-FLIP

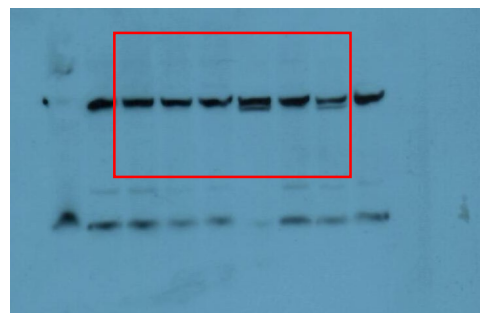

BIP

FIGURE 3A

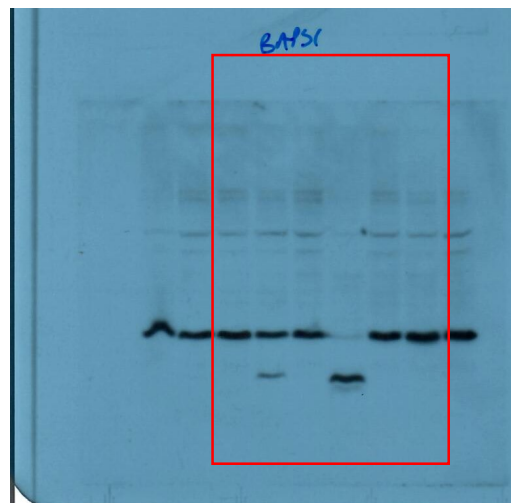

Bap31

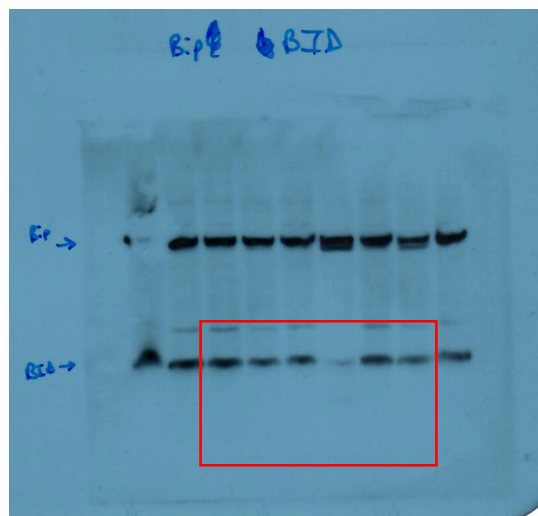

BID

FIGURE 3B

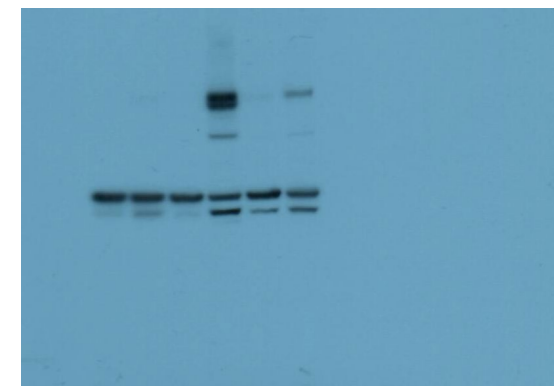

CALR

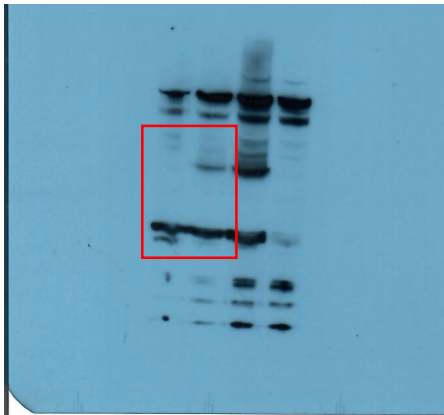

FIGURE 4A  
GFP and  
endo SphK1

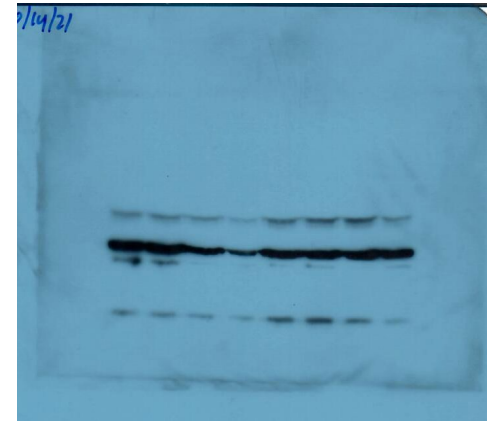

Figure 4D

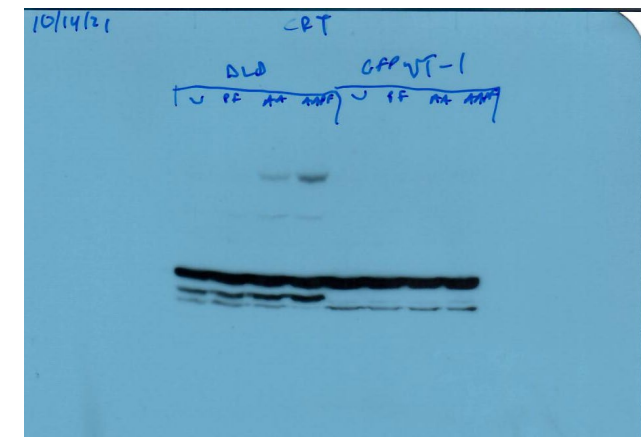

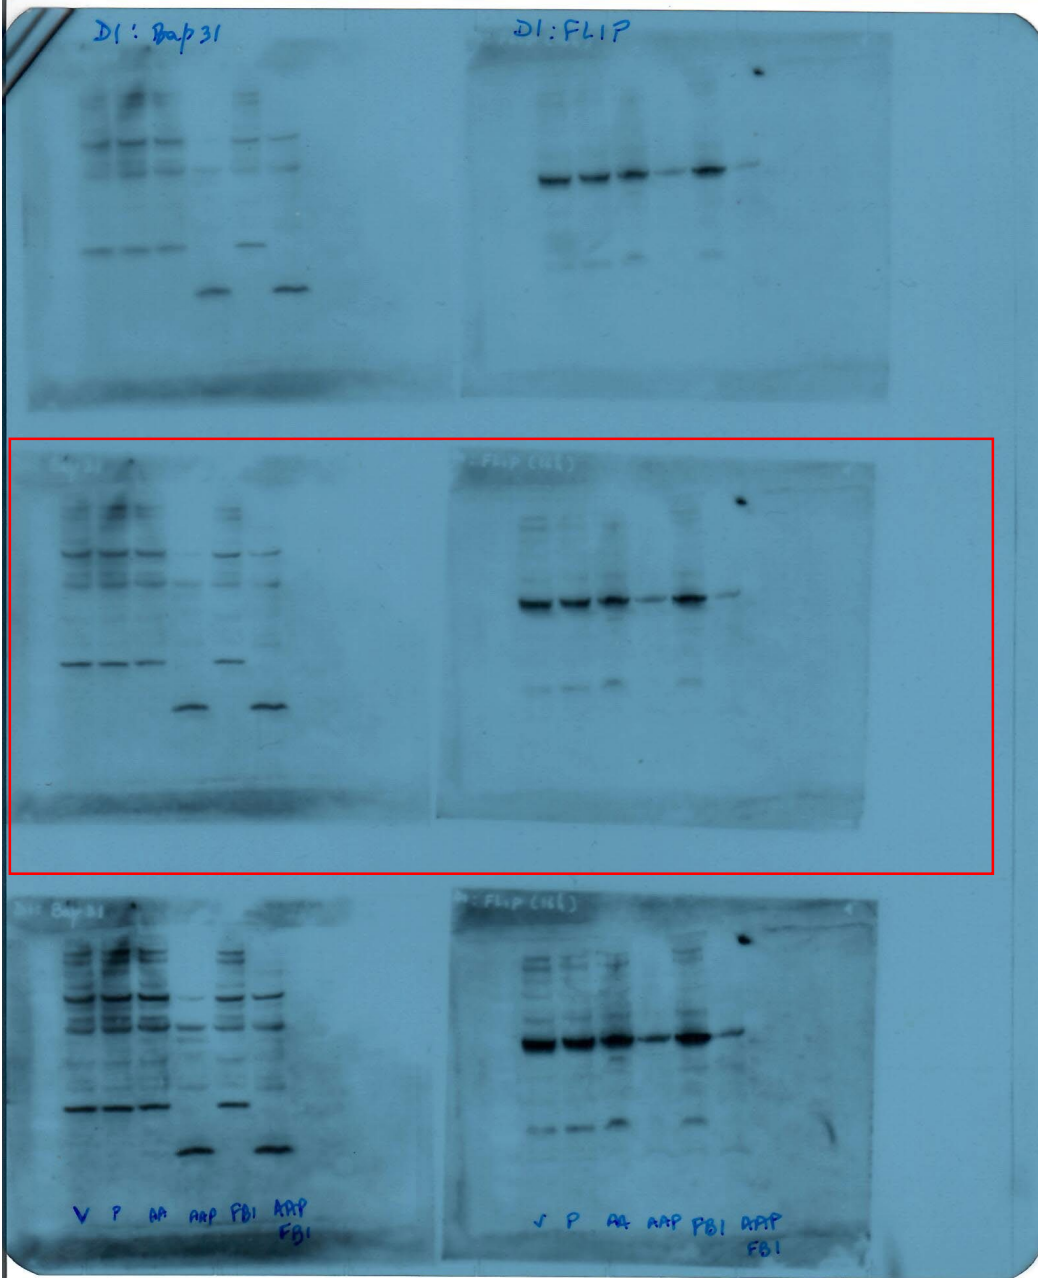

FIGURE 5A BAP31 and C-FLIP

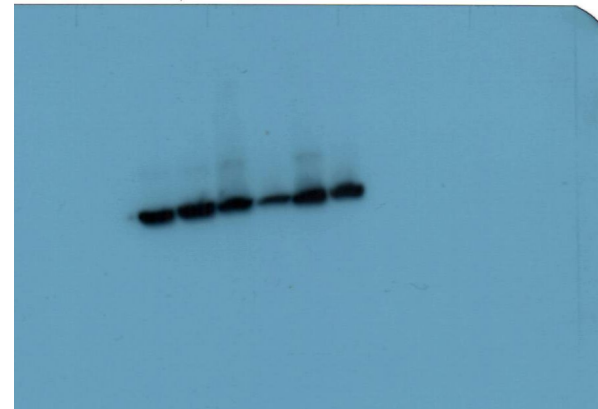

FIGURE 5A  
GAPDH

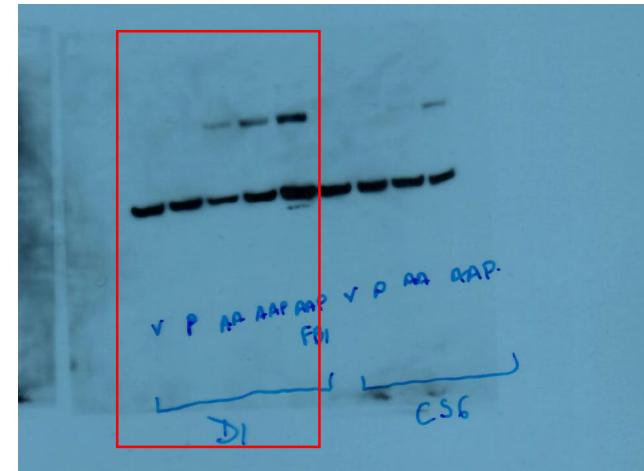

FIGURE 5B  
CALR

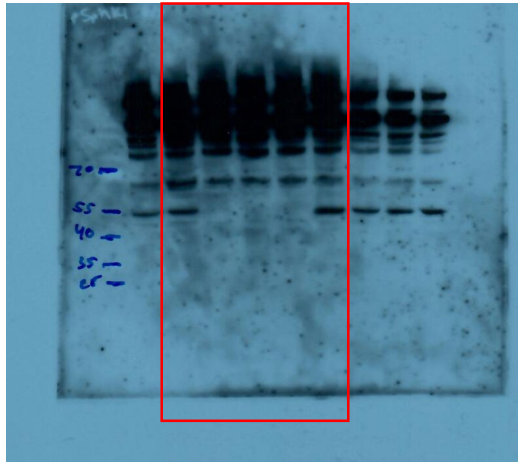

Figure 6A  
phosphoSphK1

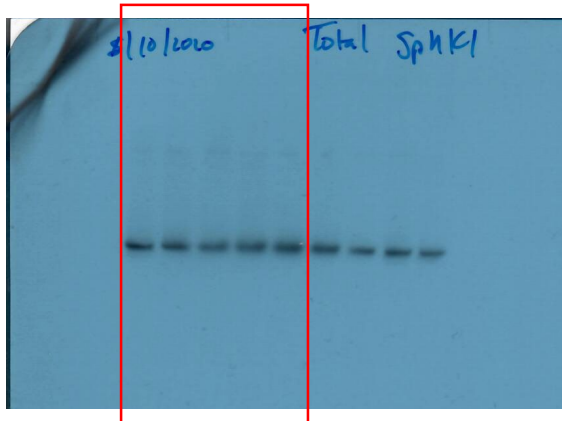

Figure 6B  
TotalSphK1



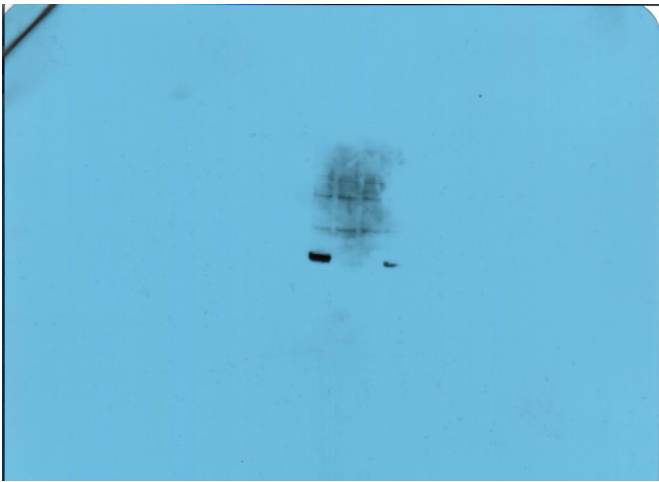

Figure 8A  
Cers6

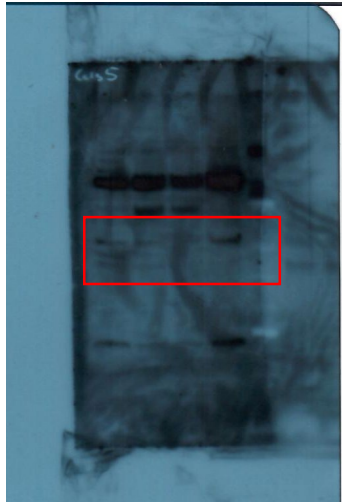

Figure 8C  
Cers5

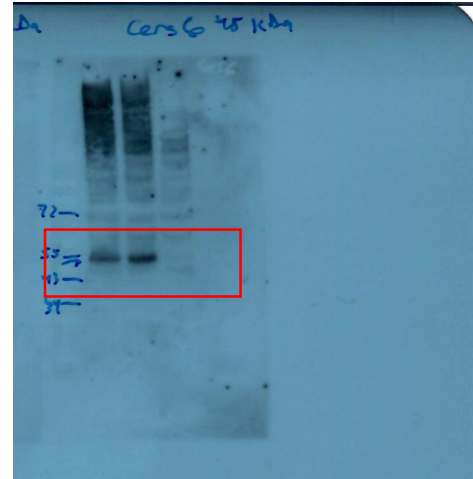

Figure 8E  
Cers6  
And GAPDH

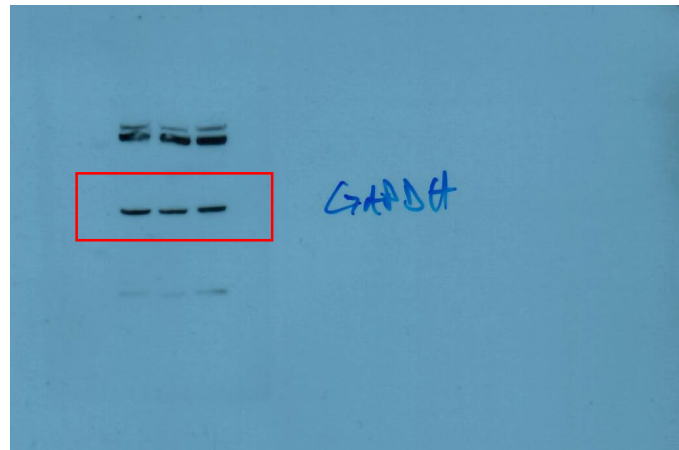

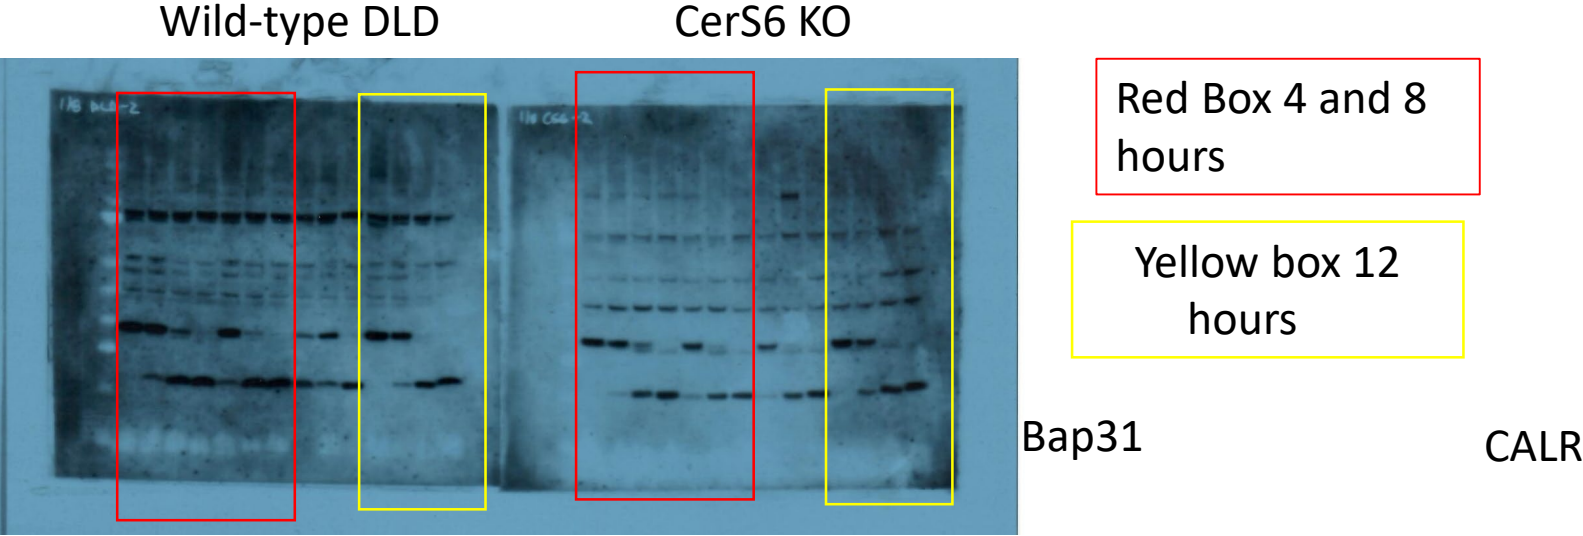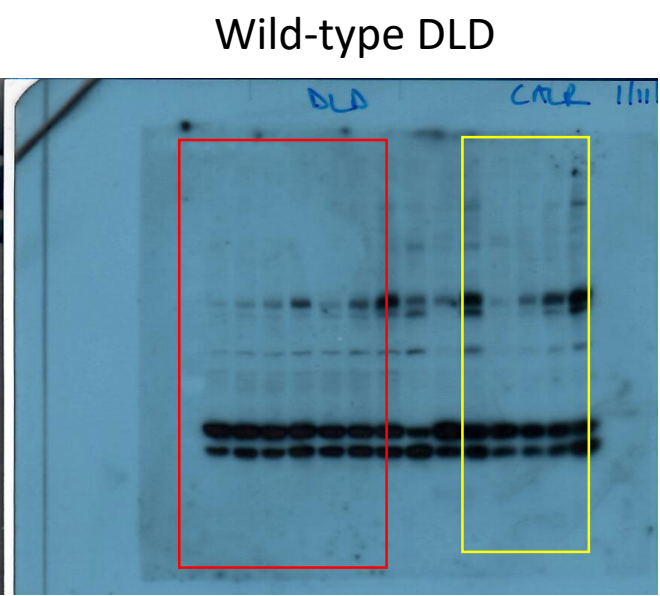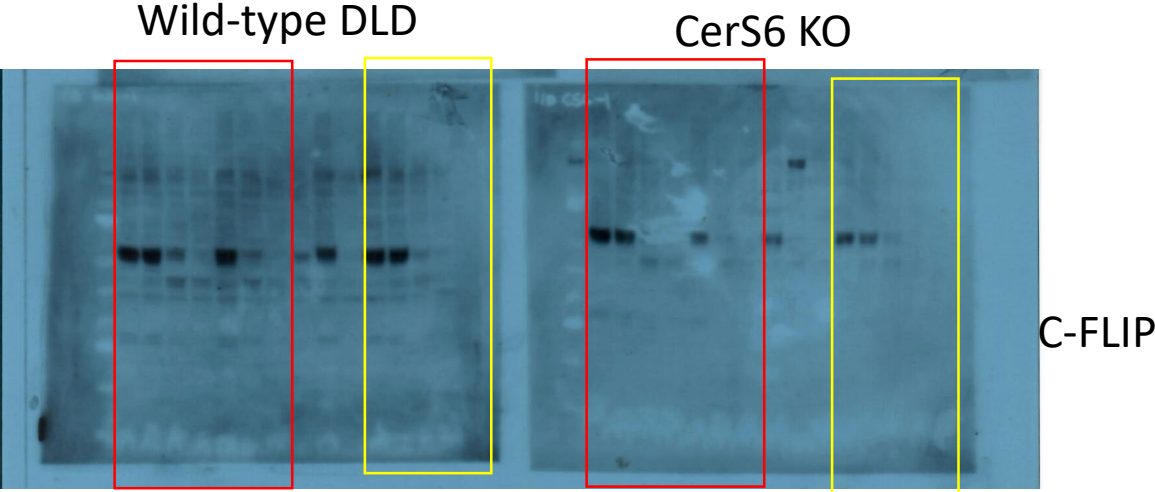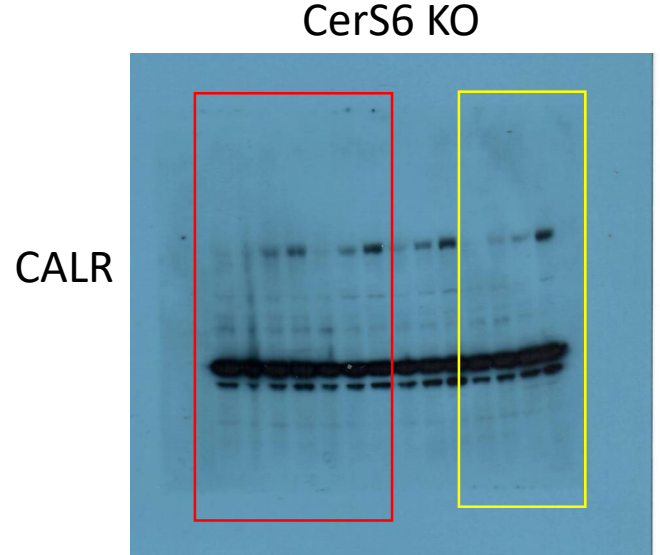

FIGURE 8F
